# Supplementary material for: Deer thymosin beta 10 functions as a novel factor for angiogenesis and chondrogenesis during antler growth and regeneration
Source: PubMed Central journal article supplement (PMC6009950; doi:10.1186/s13287-018-0917-y), 2018-06-19
Supplement: 13287_2018_917_MOESM11_ESM.pdf [file 13287_2018_917_MOESM11_ESM.pdf]

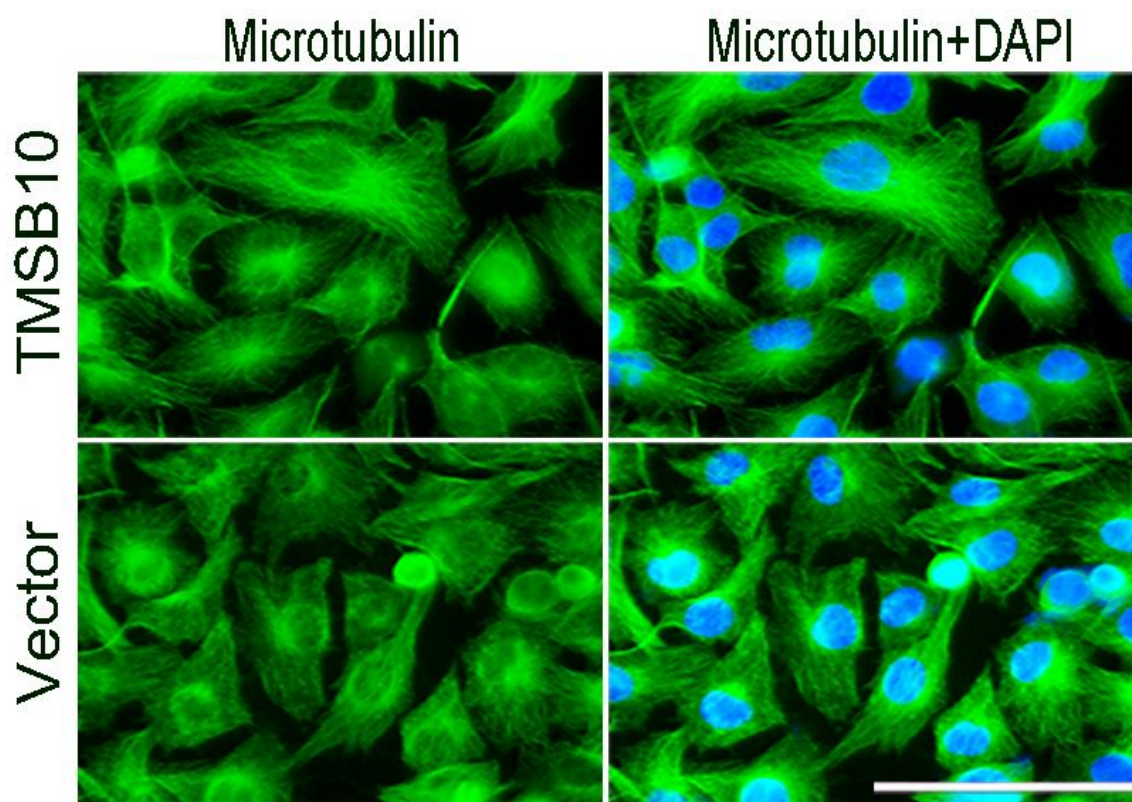

Additional file 11:Figure S10
